# Supplementary material for: Functional specialization of retinal Müller cell endfeet depends on an interplay between two syntrophin isoforms
Source: Springer Nature journal article supplement (doi:10.1186/s13041-020-00581-w), 2020-03-16

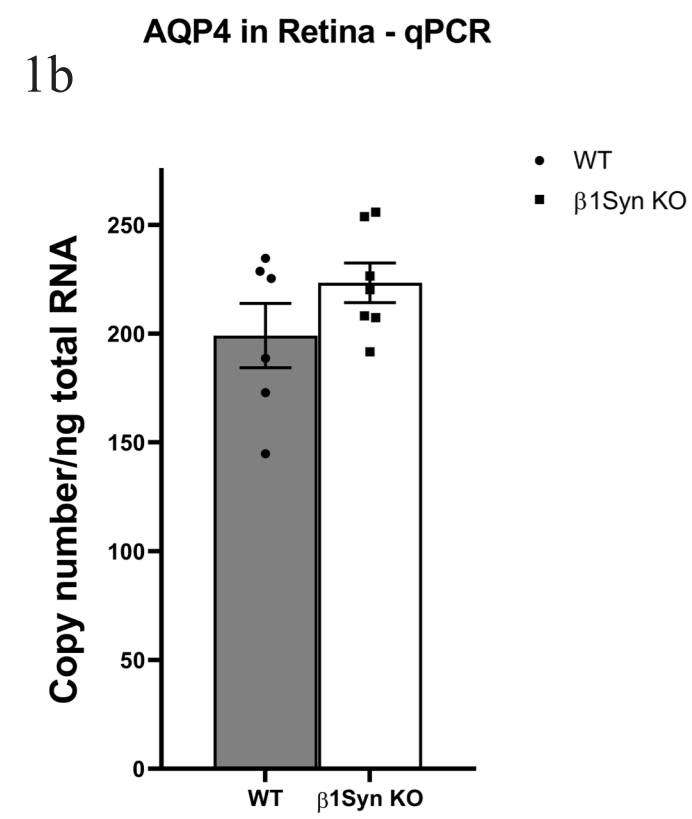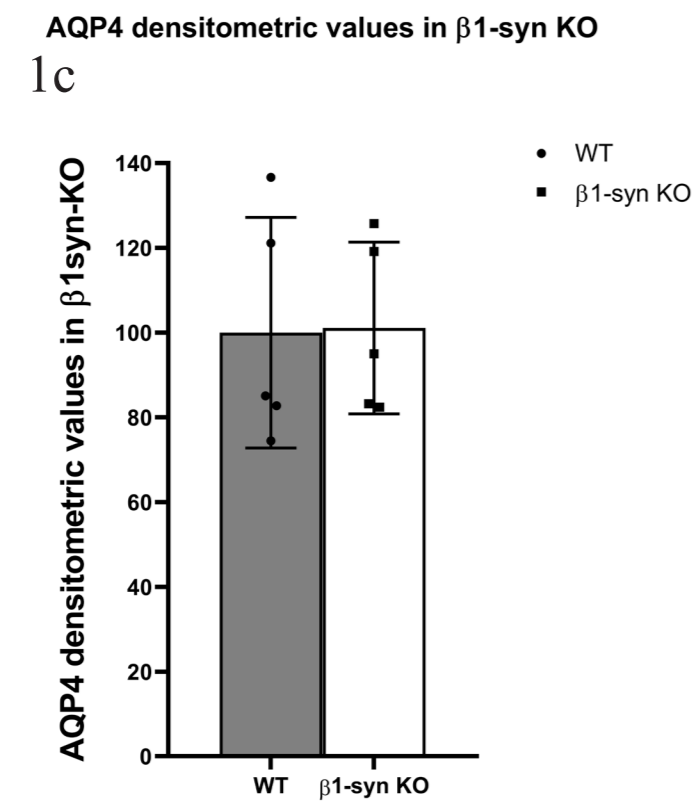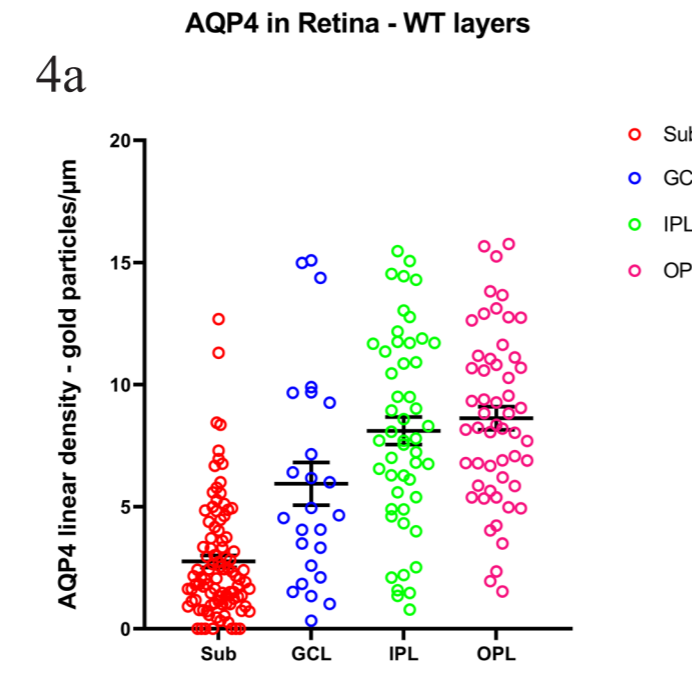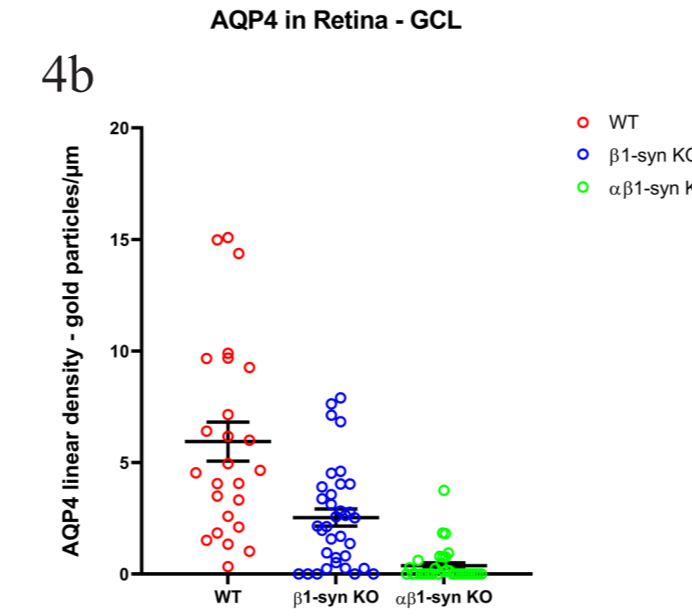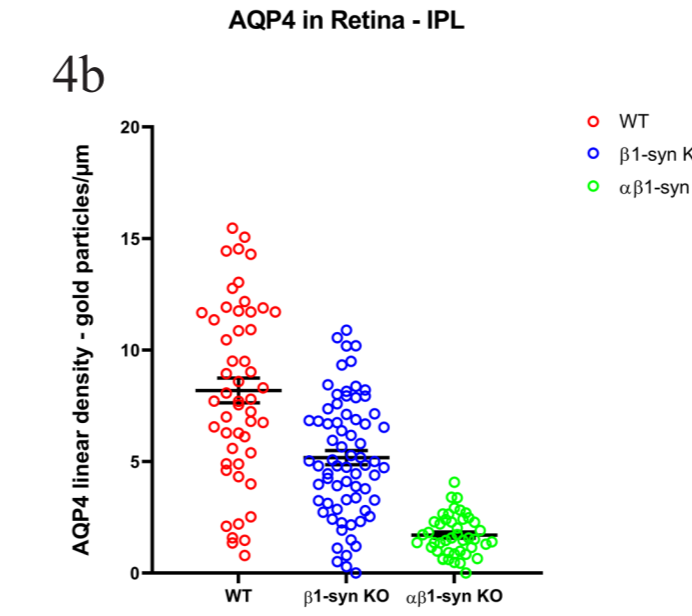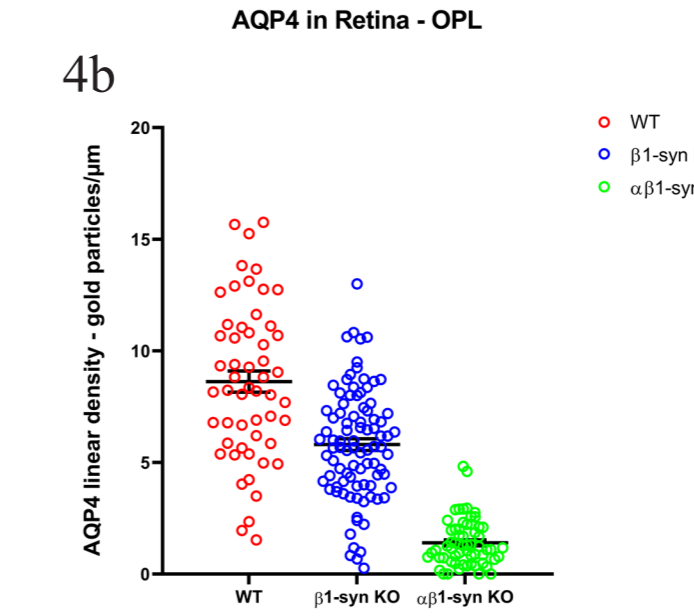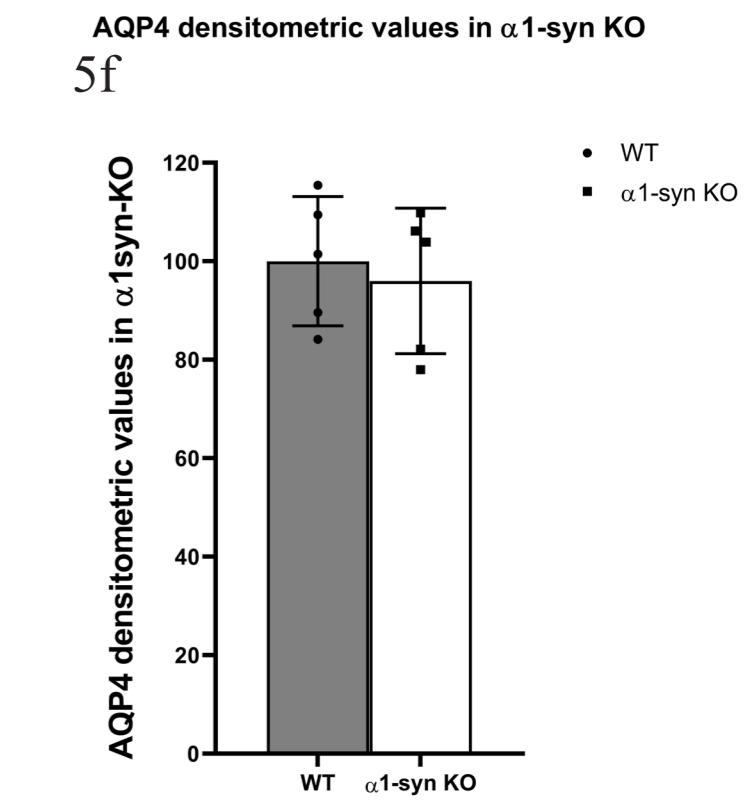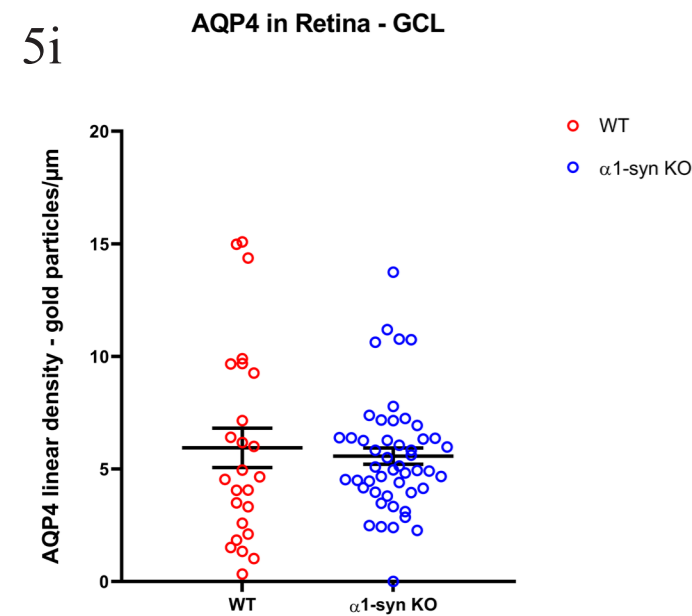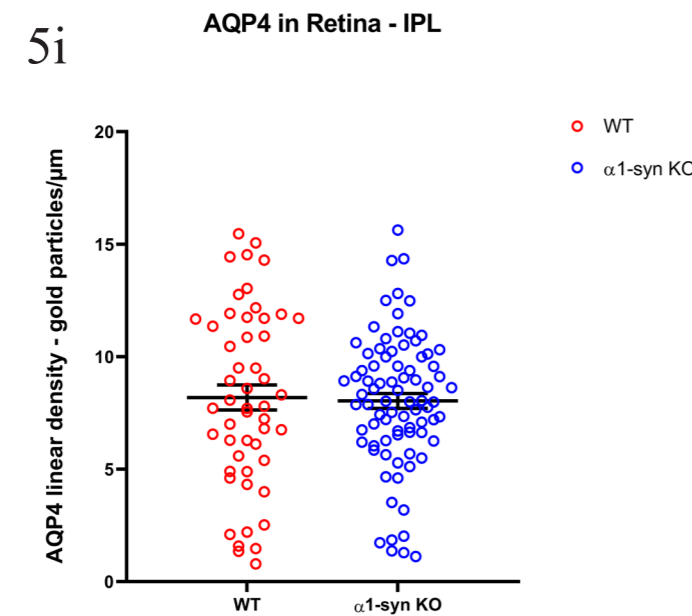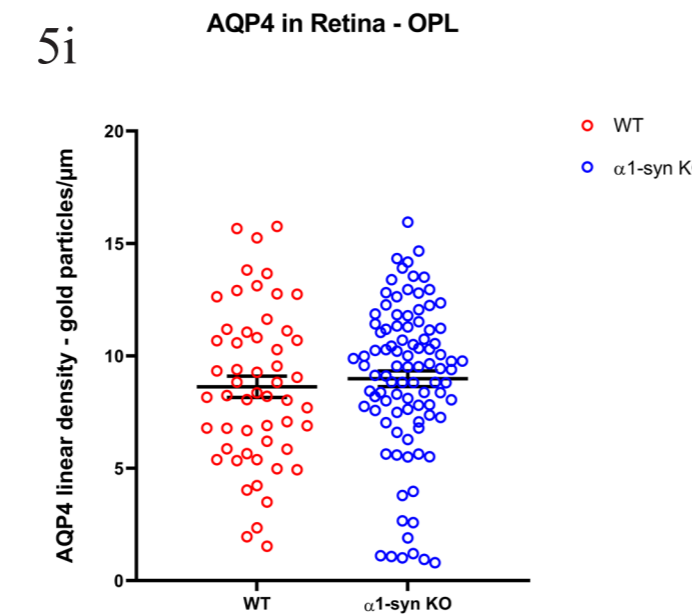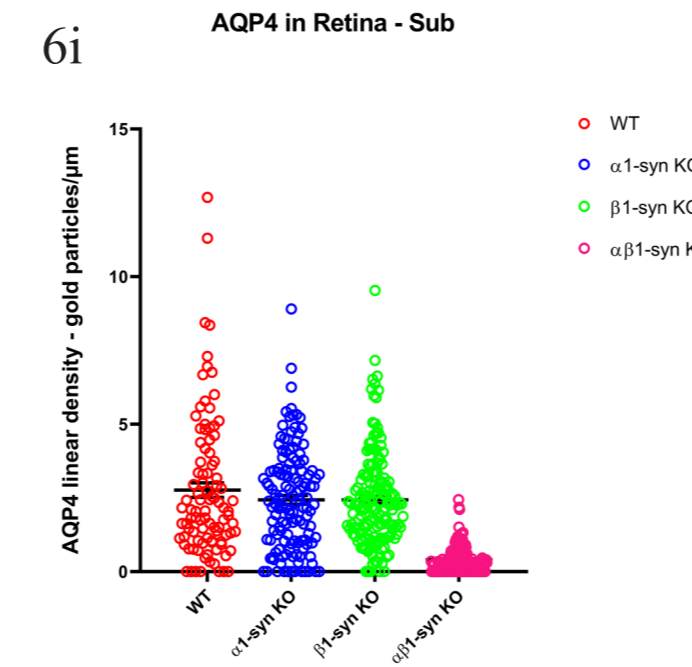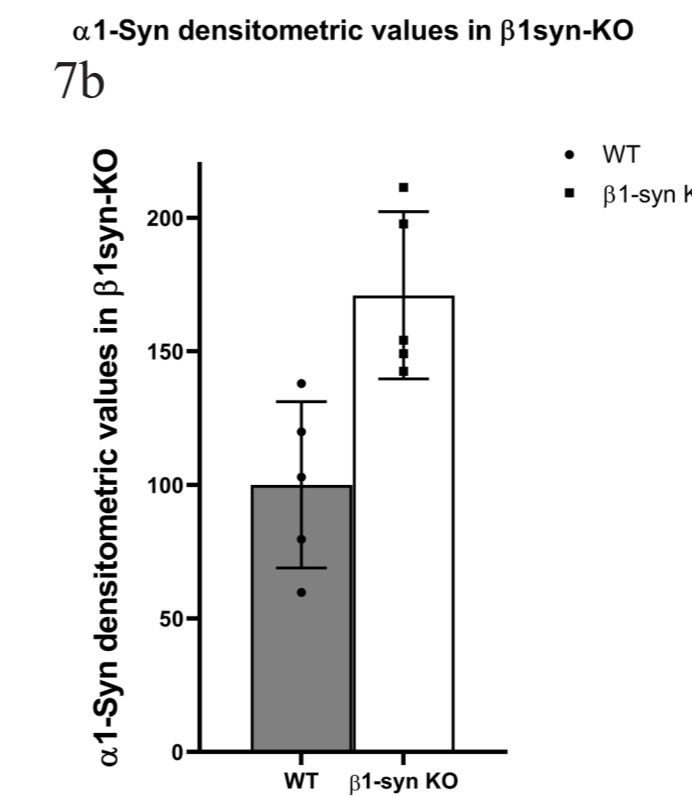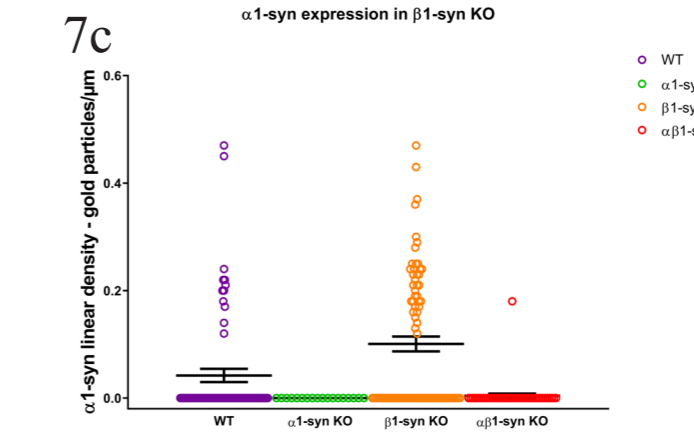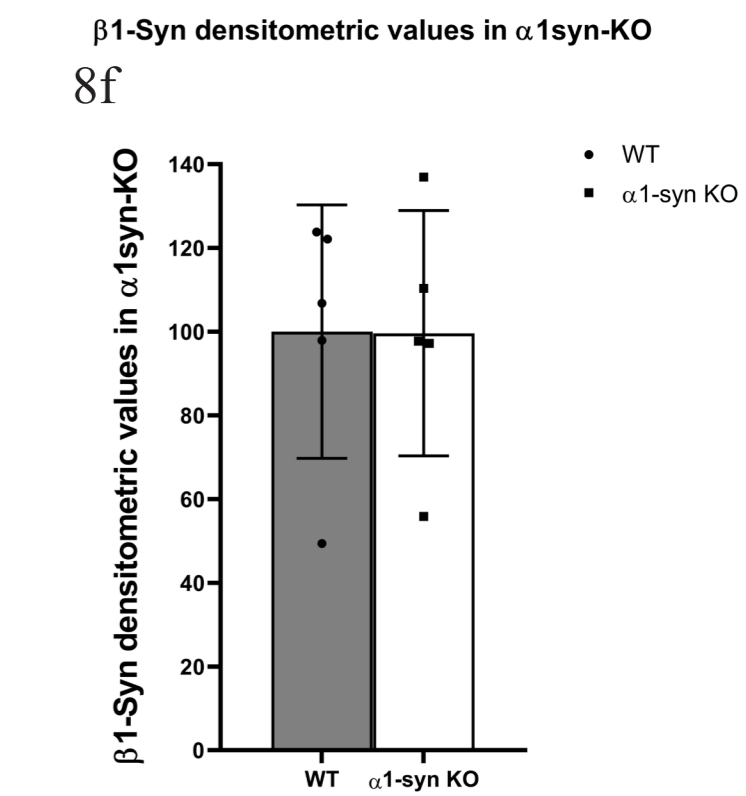

Supplement: MOESM2 [file 13041_2020_581_MOESM2_ESM.pdf]
